# Supplementary material for: CUL5-ARIH2 E3-E3 ubiquitin ligase structure reveals cullin-specific NEDD8 activation
Source: PubMed Central journal article supplement (PMC8460447; doi:10.1038/s41589-021-00858-8), 2021-09-13
Supplement: 41589_2021_858_MOESM1_ESM.pdf [file 41589_2021_858_MOESM1_ESM.pdf]

---

**Supplementary information**

---

**CUL5-ARIH2 E3-E3 ubiquitin ligase  
structure reveals cullin-specific NEDD8  
activation**

---

In the format provided by the  
authors and unedited

**Supplementary Table 1. Crystallographic data collection and refinement statistics**

| Autoinhibited ARIH2                                  |                            |
|------------------------------------------------------|----------------------------|
| <b>Data collection</b>                               |                            |
| Space group                                          | P 1 21 1                   |
| Cell dimensions                                      |                            |
| <i>a</i> , <i>b</i> , <i>c</i> (Å)                   | 77.57 80.54 92.09          |
| $\alpha$ , $\beta$ , $\gamma$ (°)                    | 90 105.76 90               |
| Resolution (Å)                                       | 66.7 - 2.45 (2.54 - 2.45)* |
| <i>R</i> <sub>sym</sub> or <i>R</i> <sub>merge</sub> | 0.13 (2.4)                 |
| <i>I</i> / $\sigma$ <i>I</i>                         | 19.5 (1.0)                 |
| Completeness (%)                                     | 95.9 (75.0)                |
| Redundancy                                           | 18.6 (11.2)                |
| <b>Refinement</b>                                    |                            |
| Resolution (Å)                                       | 2.45                       |
| No. reflections                                      | 38685 (2975)               |
| <i>R</i> <sub>work</sub> / <i>R</i> <sub>free</sub>  | 22.1 / 26.1                |
| No. atoms                                            | 6972                       |
| Protein                                              | 6940                       |
| Ligand/ion                                           | 12                         |
| Water                                                | 20                         |
| <i>B</i> -factors                                    |                            |
| Protein                                              | 76.9                       |
| Ligand/ion                                           | 81.4                       |
| Water                                                | 60.9                       |
| R.m.s. deviations                                    |                            |
| Bond lengths (Å)                                     | 0.003                      |
| Bond angles (°)                                      | 0.56                       |

\*Values in parentheses are for highest-resolution shell.

**Supplemental Table 2. Cryo-EM data collection, refinement and validation statistics**

|                                                     | Neddylated<br>CRL5 <sup>Vif-CBFβ</sup><br>ARIH2*-<br>APOBEC3C | Neddylated<br>CRL5 <sup>Vif-CBFβ</sup><br>ARIH2*-<br>APOBEC3C | Neddylated<br>CUL5 C-<br>terminal region-<br>RBX2-ARIH2* | Neddylated<br>CRL5 <sup>Vif-CBFβ</sup><br>ARIH2*-<br>APOBEC3G | Neddylated CUL5<br>C-terminal region-<br>RBX2-ARIH2* |
|-----------------------------------------------------|---------------------------------------------------------------|---------------------------------------------------------------|----------------------------------------------------------|---------------------------------------------------------------|------------------------------------------------------|
| Map name in processing pipeline                     | A3C consensus                                                 | A3C full complex consensus                                    | A3C E3-E3 catalytic focused                              | A3G consensus                                                 | A3G E3-E3 catalytic focused                          |
| Accession codes                                     | EMD-13000                                                     | EMD-12998                                                     | EMD-12995<br>PDB 7ONI                                    | EMD-13001                                                     | EMD-12999                                            |
| <b>Data collection and processing</b>               |                                                               |                                                               |                                                          |                                                               |                                                      |
| Microscope/detector                                 | Krios/K3                                                      | Krios/K3                                                      | Krios/K3                                                 | Krios/K3                                                      | Krios/K3                                             |
| Magnification                                       | 105,000                                                       | 105,000                                                       | 105,000                                                  | 81,000                                                        | 81,000                                               |
| Voltage (kV)                                        | 300                                                           | 300                                                           | 300                                                      | 300                                                           | 300                                                  |
| Electron exposure (e <sup>-</sup> /Å <sup>2</sup> ) | 14.9                                                          | 14.9                                                          | 14.9                                                     | 15                                                            | 15                                                   |
| Defocus range (μm)                                  | 0.7 ~ 2.5                                                     | 0.7 ~ 2.5                                                     | 0.7 ~ 2.5                                                | 0.7 ~ 2.5                                                     | 0.7 ~ 2.5                                            |
| Pixel size (Å)                                      | 0.8512                                                        | 0.8512                                                        | 0.8512                                                   | 1.094                                                         | 1.094                                                |
| Symmetry imposed                                    | n/a                                                           | n/a                                                           | n/a                                                      | n/a                                                           | n/a                                                  |
| Initial particle images (no.)                       | 5,030,529                                                     | 5,030,529                                                     | 5,030,529                                                | 1,200,719                                                     | 1,200,719                                            |
| Final particle images (no.)                         | 191,538                                                       | 7,689                                                         | 191,792                                                  | 194,585                                                       | 194,585                                              |
| Map resolution (Å)                                  | 3.7                                                           | 6.8                                                           | 3.4                                                      | 3.8                                                           | 3.5                                                  |
| FSC threshold                                       |                                                               |                                                               |                                                          |                                                               |                                                      |
| Map resolution range (Å)                            | 3.3 – 8.2                                                     | -                                                             | 3.2 – 6.2                                                | 3.4 – 8.0                                                     | 3.3 – 6.3                                            |
| <b>Refinement</b>                                   |                                                               |                                                               |                                                          |                                                               |                                                      |
| Initial model used (PDB code)                       |                                                               |                                                               | 3DQV<br>7OD1                                             |                                                               |                                                      |
| Model resolution (Å)                                |                                                               |                                                               | 3.40                                                     |                                                               |                                                      |
| FSC threshold                                       |                                                               |                                                               | 0.143                                                    |                                                               |                                                      |
| Map sharpening <i>B</i> factor (Å <sup>2</sup> )    |                                                               |                                                               | -70                                                      |                                                               |                                                      |
| Model composition                                   |                                                               |                                                               |                                                          |                                                               |                                                      |
| Non-hydrogen atoms                                  |                                                               |                                                               | 8840                                                     |                                                               |                                                      |
| Protein residues                                    |                                                               |                                                               | 1141                                                     |                                                               |                                                      |
| Ligands                                             |                                                               |                                                               | 7                                                        |                                                               |                                                      |
| <i>B</i> factors (Å <sup>2</sup> )                  |                                                               |                                                               |                                                          |                                                               |                                                      |
| Protein                                             |                                                               |                                                               | 99                                                       |                                                               |                                                      |
| Ligand                                              |                                                               |                                                               | 155                                                      |                                                               |                                                      |
| R.m.s. deviations                                   |                                                               |                                                               |                                                          |                                                               |                                                      |
| Bond lengths (Å)                                    |                                                               |                                                               | 0.003                                                    |                                                               |                                                      |
| Bond angles (°)                                     |                                                               |                                                               | 0.529                                                    |                                                               |                                                      |
| Validation                                          |                                                               |                                                               |                                                          |                                                               |                                                      |
| MolProbity score                                    |                                                               |                                                               | 1.7                                                      |                                                               |                                                      |
| Clashscore                                          |                                                               |                                                               | 7.1                                                      |                                                               |                                                      |
| Poor rotamers (%)                                   |                                                               |                                                               | 0                                                        |                                                               |                                                      |
| Ramachandran plot                                   |                                                               |                                                               |                                                          |                                                               |                                                      |
| Favored (%)                                         |                                                               |                                                               | 96                                                       |                                                               |                                                      |
| Allowed (%)                                         |                                                               |                                                               | 4                                                        |                                                               |                                                      |
| Disallowed (%)                                      |                                                               |                                                               | 0                                                        |                                                               |                                                      |
