# Supplementary material for: CUL5-ARIH2 E3-E3 ubiquitin ligase structure reveals cullin-specific NEDD8 activation
Source: PubMed Central journal article supplement (PMC8460447; doi:10.1038/s41589-021-00858-8), 2021-09-13

Figure 3g

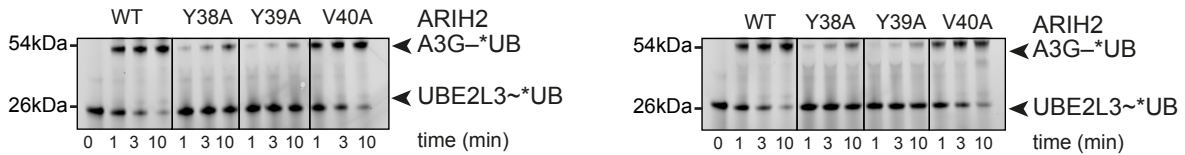

Figure 3h

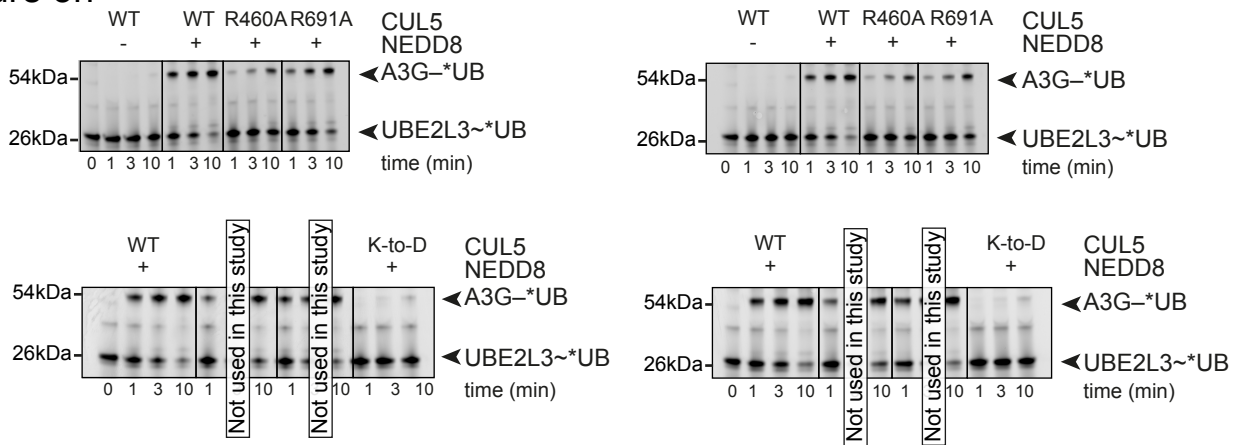

Figure 3g

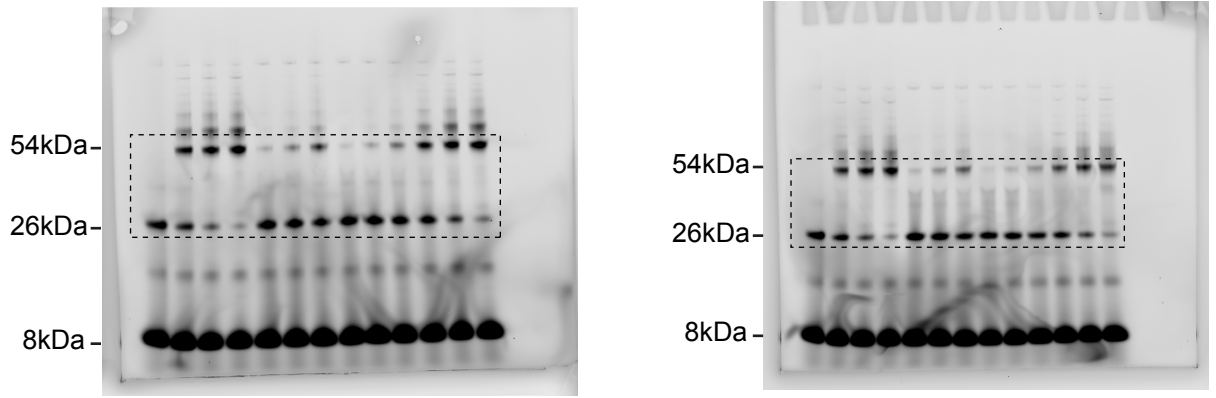

Figure 3h

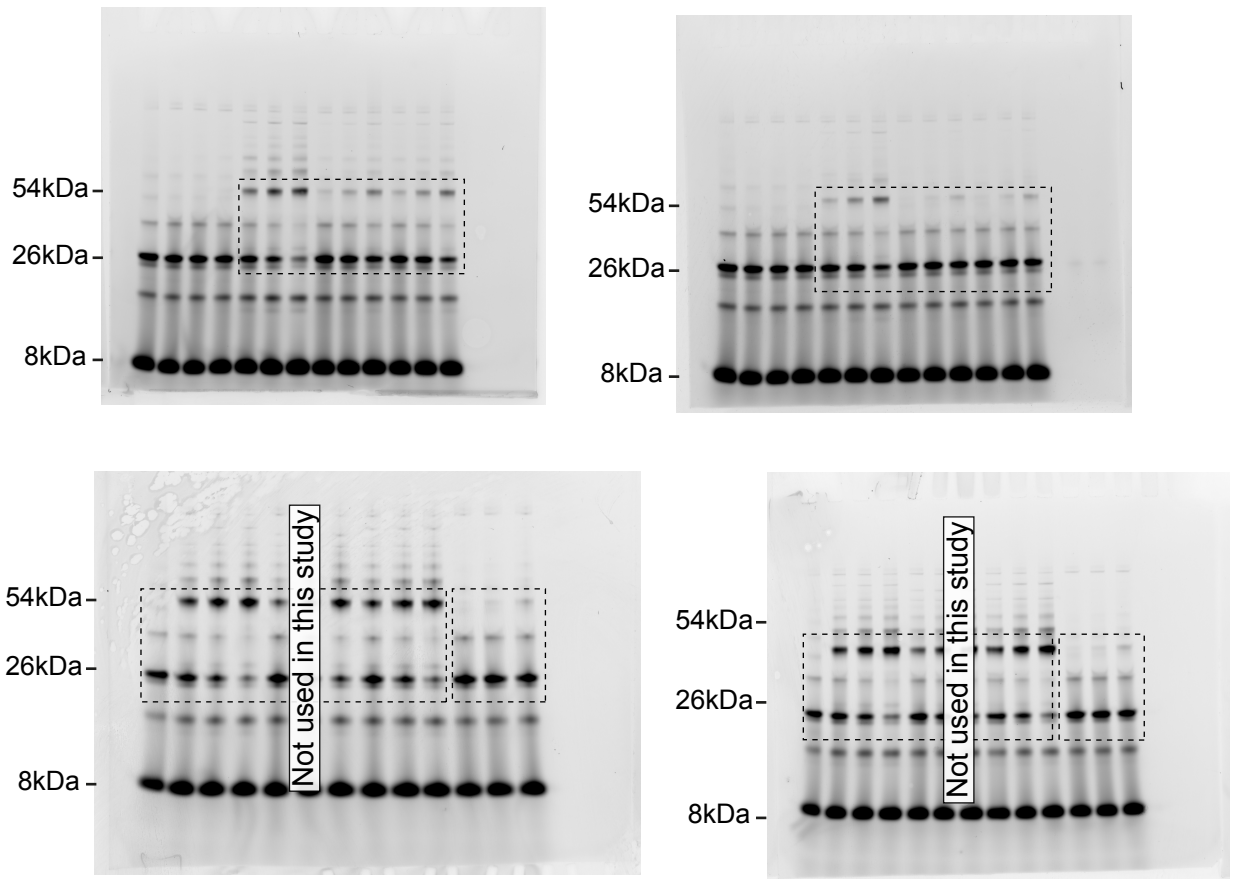

Supplement: 41589_2021_858_MOESM5_ESM.pdf [file 41589_2021_858_MOESM5_ESM.pdf]
